# Supplementary material
Source: MDPI journal article supplement (https://www.mdpi.com/2073-4352/10/6/530)
Supplement: s1 [file s1]

# Generalized Methodology for Inserting Metal Heteroatoms into the Layered Zeolite Precursor RUB-36 by Interlayer Expansion

Chaoqun Bian <sup>1</sup>, Xiao Wang <sup>2</sup>, Lan Yu <sup>1</sup>, Fen Zhang <sup>3</sup>, Jie Zhang <sup>1</sup>, Zhengxin Fei <sup>1,\*</sup>, Jianping Qiu <sup>1,\*</sup>, and Longfeng Zhu <sup>2,\*</sup>

<sup>1</sup> Pharmaceutical and Material Engineering School, Jinhua Polytechnic, Jinhua 321000, P. R. China; bian00@zju.edu.cn (C. Q. B.); 0579zjzj2@sina.com (J. Z.); haze\_m@163.com (L. Y.)

<sup>2</sup> College of Biological, Chemical Sciences and Engineering, Jiaying University, Jiaying 314001, P. R. China; wxxx0225@163.com (X. W.)

<sup>3</sup> Institute of Applied Chemistry, Jiangxi Academy of Sciences, Nanchang, 330096, P. R. China; cathyzf@163.com (F. Z.)

\* Correspondence: jianpingqiu@jhc.edu.cn (J. P. Q.); feizhengxin@jhc.edu.cn (Z. X. F.); zhulf1988@mail.zjxu.edu.cn (L.F.Z.)

Tel.: +86-579-8226-4066 (J. P. Q. and Z. X. F.); +86-573-8364-0131(L.F.Z.)

## Synthesis

In a typical example for synthesis of Zn-JHP-1, 0.2 g RUB-36 zeolite, 10 ml HCl (1 M) and 0.026 g Zn(acac)<sub>2</sub>Cl<sub>2</sub> were stirred for 4 hours at room temperature. The mixture was then transferred into a stainless steel reaction vessel, sealed and heated at 180 °C for 24 h. After filtration and drying, the white power could be obtained, which was named as Zn-JHP-1. After the calcination at 550 °C for 5 h, the final product could be obtained, which was named as Zn-JHP-2.

Similarly, the above-described procedure was employed for synthesis of Fe-JHP-1, using 0.2 g RUB-36 zeolite, 10 ml HCl (0.5 M) and 0.02 g Fe(acac)<sub>3</sub>. The final product was named as Fe-JHP-2.

Finally, the same procedure was used for synthesis of Co-JHP-1, using 0.2 g RUB-36 zeolite, 10 ml HCl (1 M) and 0.015 g Co(acac)<sub>2</sub>. The final product was named as Co-JHP-2.

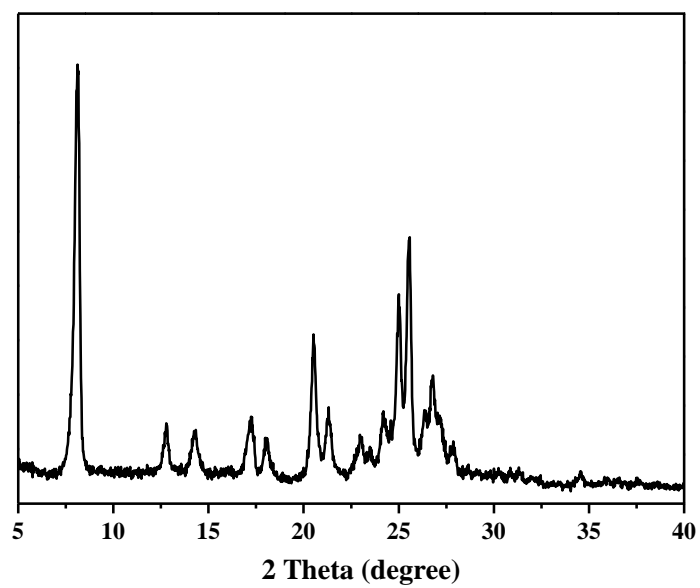

Figure S1 XRD pattern of Sn-JHP-2-r.
